# Supplementary material for: Effect of storage temperature on lipid oxidation and changes in nutrient contents in peanuts
Source: PubMed Central journal article supplement (PMC6657719; doi:10.1002/fsn3.1069), 2019-06-11
Supplement: FSN3-7-2280-s001.pdf [file FSN3-7-2280-s001.pdf]

**SUPPLEMENTARY MATERIALS:****Supplementary Table 1.**

The information of different fatty acid methyl ester of the **Fig 1**.

| Number | Keep time | Peak area | Peak height | Peak width | Symmetry factor | Peak area( %) | Fatty acid |
|--------|-----------|-----------|-------------|------------|-----------------|---------------|------------|
| 1      | 9.010     | 13        | 7.7         | 0.0269     | 0.936           | 2.34          | C4:0       |
| 2      | 9.560     | 14.7      | 8.3         | 0.0287     | 0.999           | 2.658         | C6:0       |
| 3      | 10.574    | 16.3      | 8.1         | 0.0314     | 0.999           | 2.939         | C8:0       |
| 4      | 12.319    | 17.2      | 7.3         | 0.0371     | 1.004           | 3.109         | C10:0      |
| 5      | 13.514    | 8.7       | 3.4         | 0.0404     | 1.004           | 1.577         | C11:0      |
| 6      | 14.909    | 18        | 6.5         | 0.0434     | 1.01            | 3.244         | C12:0      |
| 7      | 16.460    | 9.2       | 3.1         | 0.0466     | 1.006           | 1.663         | C13:0      |
| 8      | 18.116    | 19        | 6.2         | 0.0487     | 1.005           | 3.428         | C14:0      |
| 9      | 19.410    | 9.1       | 2.9         | 0.0498     | 1.004           | 1.637         | C14:1      |
| 10     | 19.815    | 9.2       | 2.8         | 0.0515     | 1.001           | 1.666         | C15:0      |
| 11     | 21.135    | 9.2       | 2.8         | 0.0506     | 0.987           | 1.652         | C15:1      |
| 12     | 21.523    | 27.3      | 8.4         | 0.0507     | 1.04            | 4.934         | C16:0      |
| 13     | 22.614    | 9         | 2.7         | 0.0523     | 1.017           | 1.616         | C16:1      |
| 14     | 23.194    | 6.6       | 1.9         | 0.0535     | 0.926           | 1.189         | C17:0      |
| 15     | 24.277    | 9.3       | 2.8         | 0.0519     | 1.009           | 1.673         | C17:1      |
| 16     | 24.824    | 18.6      | 5.5         | 0.0533     | 0.989           | 3.364         | C18:0      |
| 17     | 25.442    | 9.2       | 2.7         | 0.0531     | 1.012           | 1.657         | C18:1n9t   |

---

|    |        |      |          |        |       |        |          |
|----|--------|------|----------|--------|-------|--------|----------|
| 18 | 25.754 | 18.9 | 5.6      | 0.0527 | 1.019 | 3.417  | C18:1n9c |
| 19 | 26.423 | 7.9  | 2.3      | 0.0539 | 1.022 | 1.433  | C18:2n6t |
| 20 | 27.115 | 8.8  | 2.6      | 0.054  | 0.991 | 1.581  | C18:2n6c |
| 21 | 27.906 | 21.8 | 6.4      | 0.0534 | 1.028 | 3.939  | C20:0    |
| 22 | 28.081 | 7.9  | 2.3      | 0.0533 | 0.987 | 1.43   | C18:3n6  |
| 23 | 28.660 | 8.1  | 2.4      | 0.0546 | 1.009 | 1.465  | C20:1    |
| 24 | 28.788 | 9.6  | 2.8      | 0.0538 | 1.009 | 1.726  | C18:3n3  |
| 25 | 29.353 | 13.9 | 4        | 0.0541 | 1     | 2.509  | C21:0    |
| 26 | 30.093 | 8.7  | 2.5      | 0.0554 | 0.98  | 1.576  | C20:2    |
| 27 | 30.774 | 42.7 | 12       | 0.056  | 1.061 | 7.701  | C22:0    |
| 28 | 31.039 | 6.3  | 1.7      | 0.0564 | 1     | 1.135  | C20:3n6  |
| 29 | 31.664 | 6.9  | 2.3      | 0.0506 | 0     | 1.247  | C22:1n9  |
| 30 | 31.767 | 10.2 | 2.6      | 0.0652 | 1     | 1.835  | C20:3n3  |
| 31 | 32.203 | 6.7  | 1.8      | 0.058  | 0.988 | 1.213  | C23:0    |
| 32 | 33.055 | 31.1 | 8        | 0.0605 | 1.06  | 5.607  | C20:4n6  |
| 33 | 33.435 | 8.7  | 2.2      | 0.0623 | 0.997 | 1.569  | C22:2    |
| 34 | 33.716 | 5.6  | 1.3      | 0.0637 | 0.997 | 1.003  | C24:0    |
| 35 | 34.732 | 93   | 21.5     | 0.0672 | 1.292 | 16.779 | C20:5n5  |
| 36 | 36.702 | 8.7  | 2        | 0.068  | 1.041 | 1.564  | C24:1    |
| 37 | 37.936 | 5.1  | 9.90E-01 | 0.0807 | 1.046 | 0.928  | C22:6n3  |

---

**Figure captions:**

**Supplementary Fig 1.** The scheme of the analytical procedures.

**Supplementary Fig 2.** Gas chromatogram of the standard fatty acid methyl ester.

**Supplementary Fig 3.** Gas chromatogram of the unstored peanuts (YH-9326) fatty acid composition.

**Supplementary Fig 4.** Gas chromatogram of peanut (YH-9326) fatty acid composition when stored at 15 °C for 80 d (A), 160 d (B), 240 d (C) and 320 d (D), respectively.

**Supplementary Fig 5.** Gas chromatogram of peanut (YH-9326) fatty acid composition when stored at 25 °C for 80 d (A), 160 d (B), 240 d (C) and 320 d (D), respectively.

**Supplementary Fig 6.** Gas chromatogram of peanut (YH-9326) fatty acid composition when stored at 35 °C for 80 d (A), 160 d (B), 240 d (C) and 320 d (D), respectively.

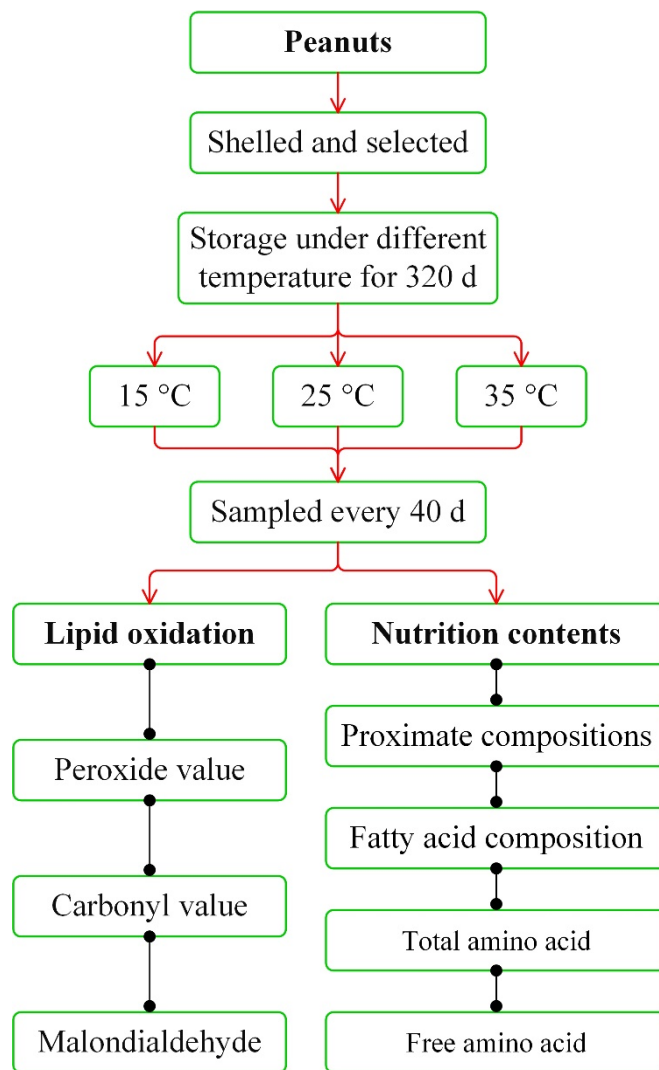

**Supplementary Fig 1**

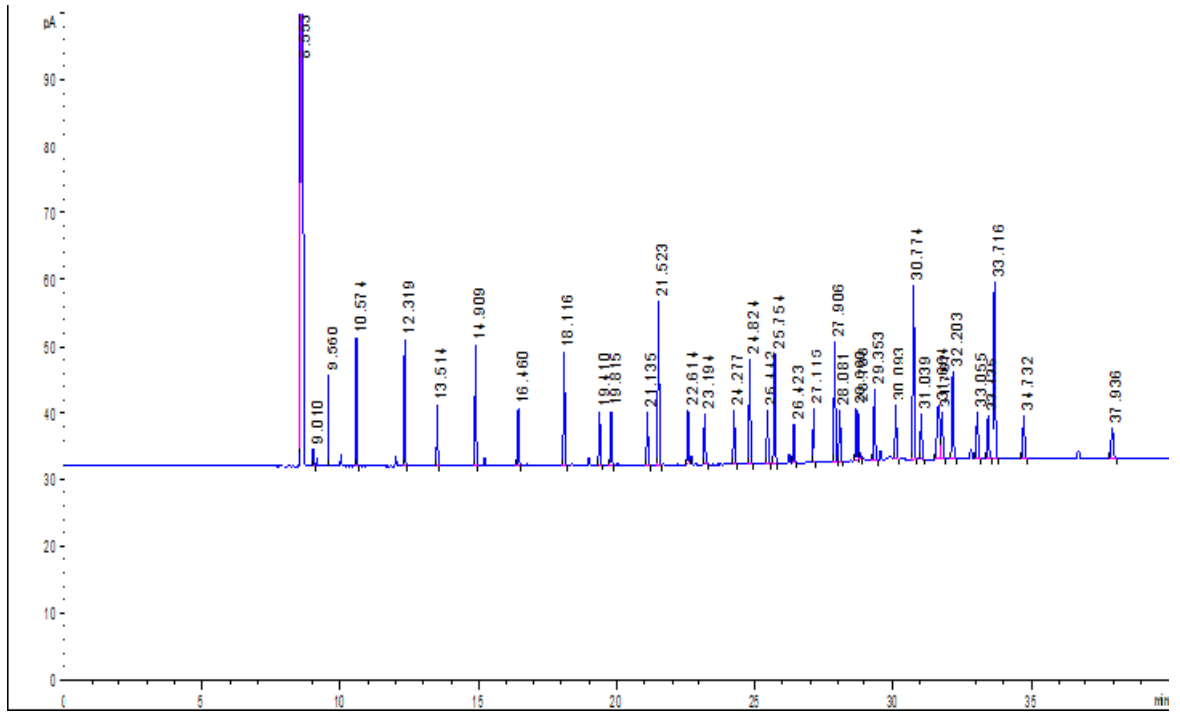

Supplementary Fig. 2

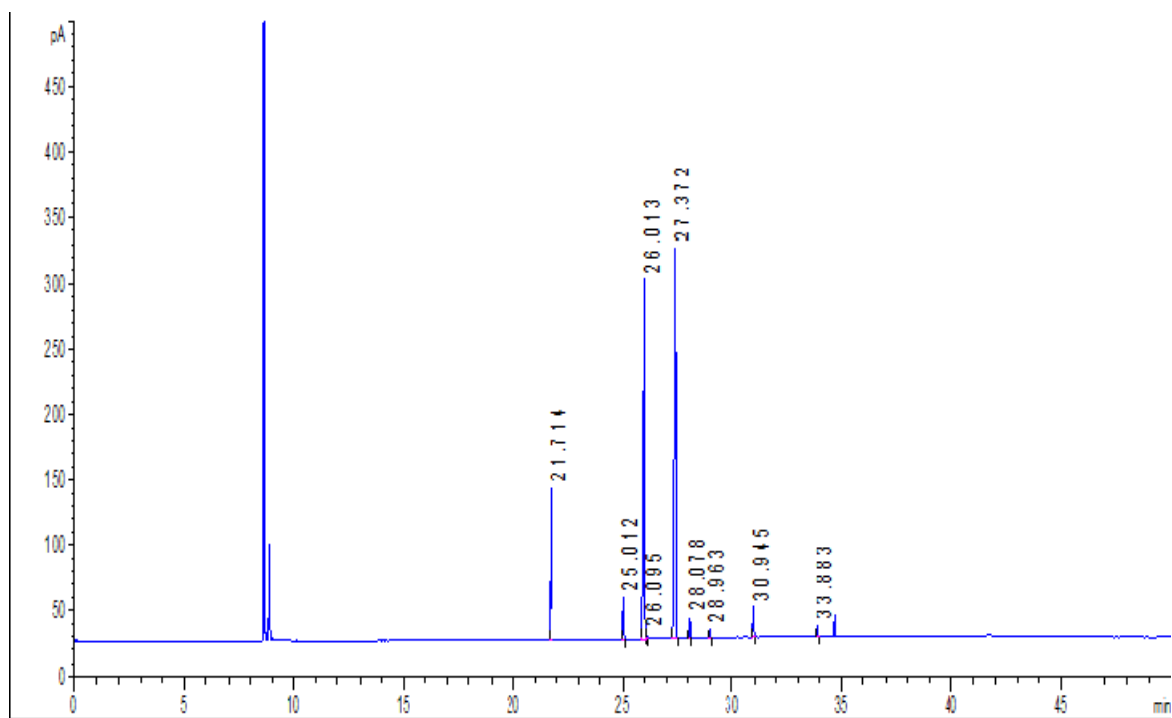

**Supplementary Fig. 3**

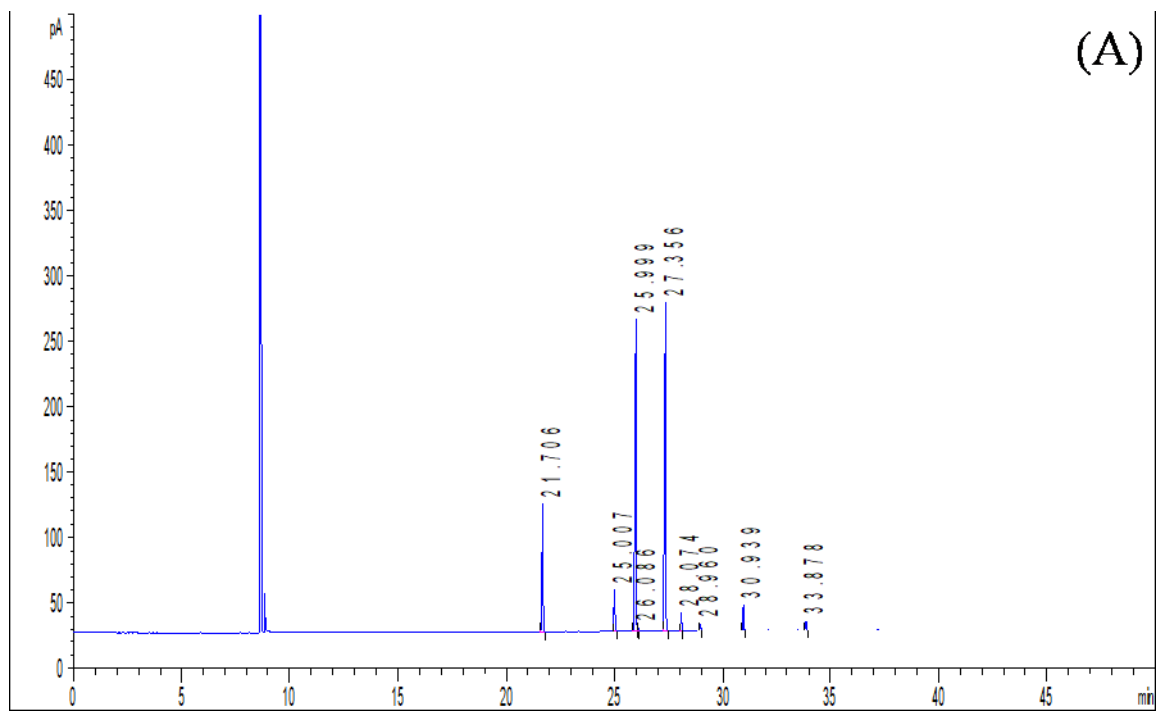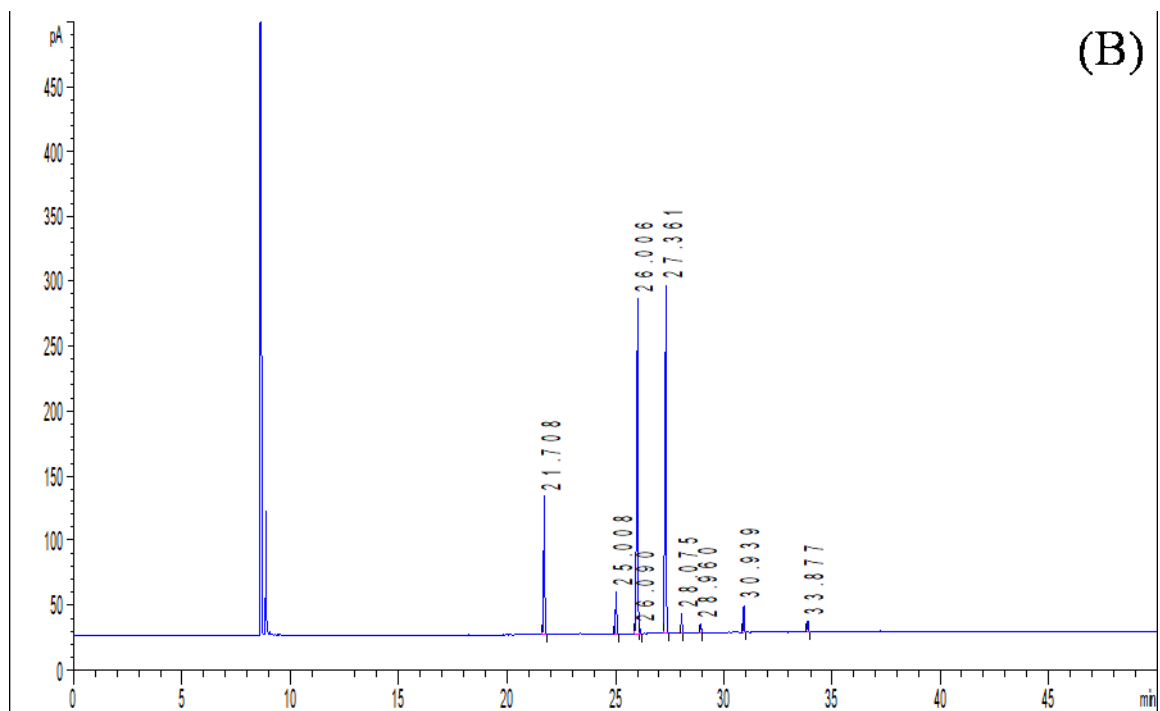

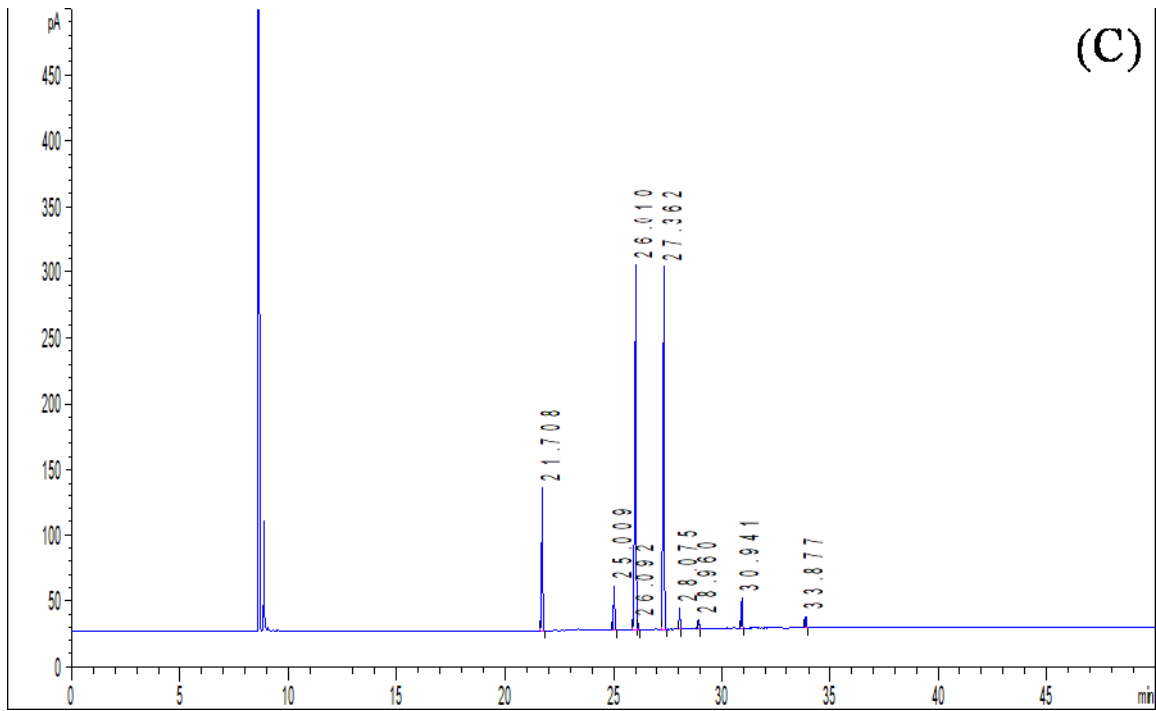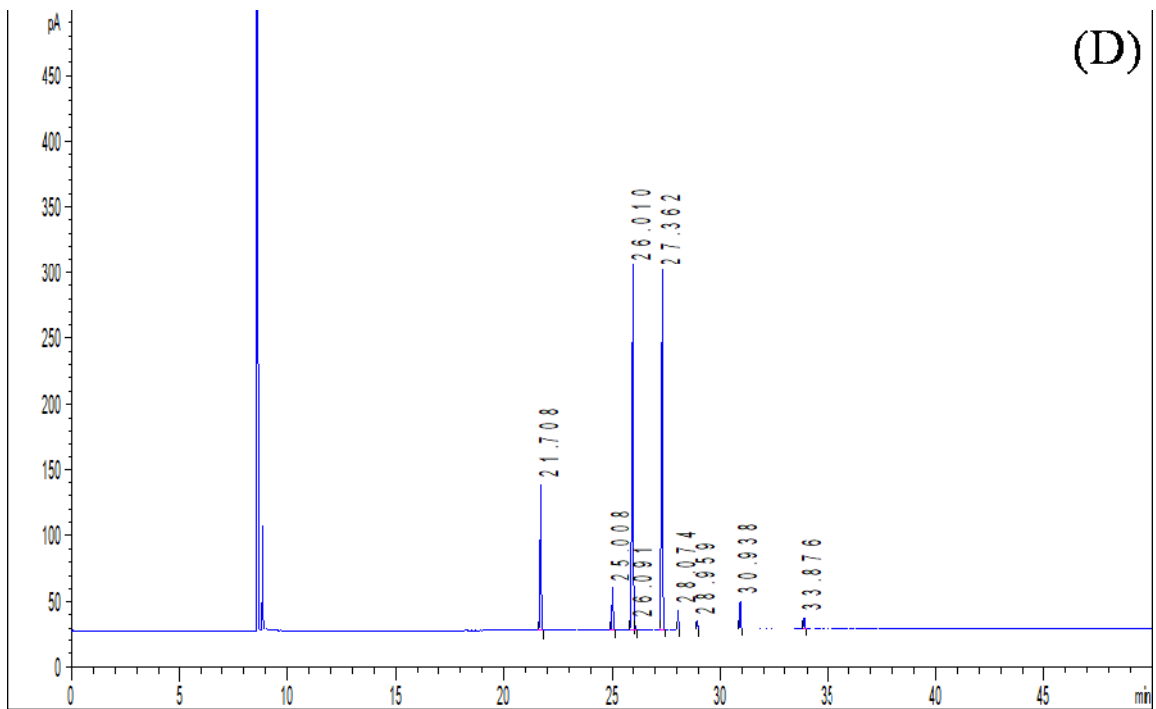

Supplementary Fig. 4



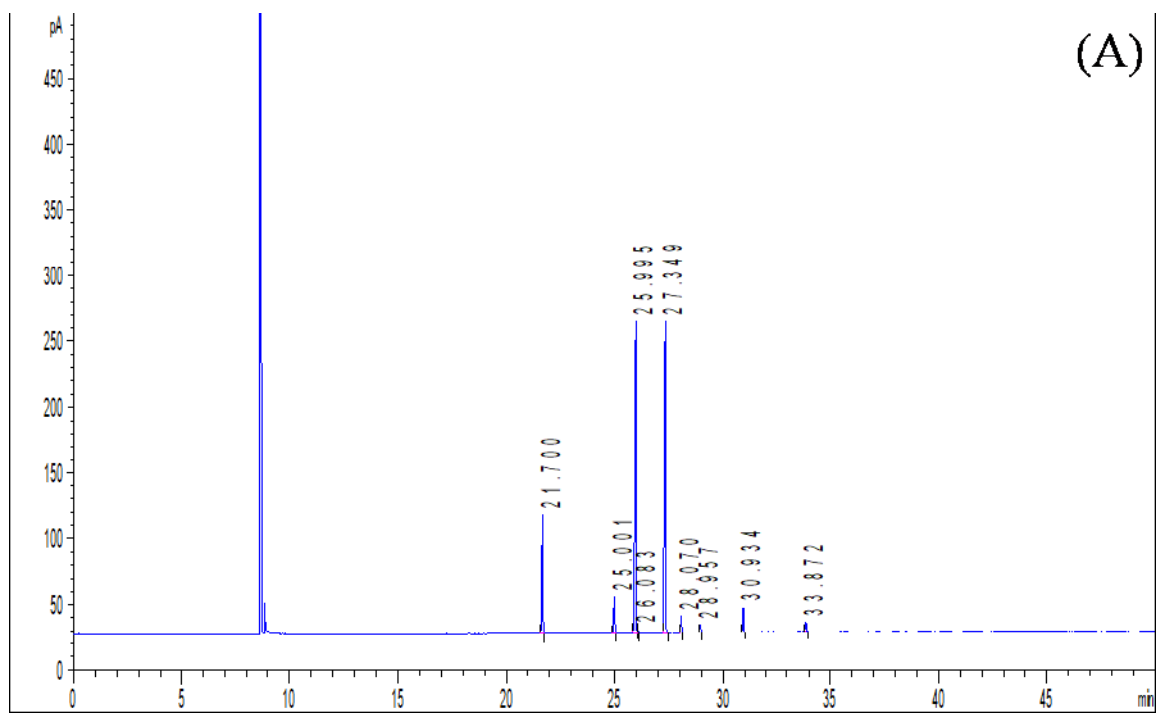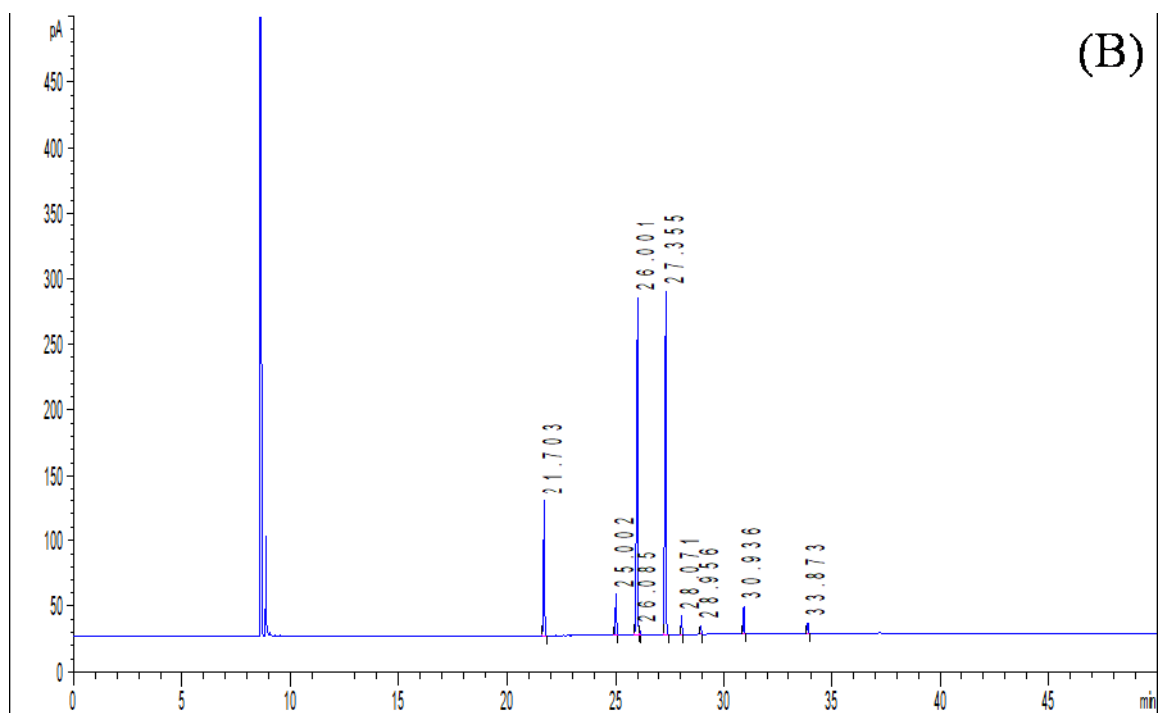

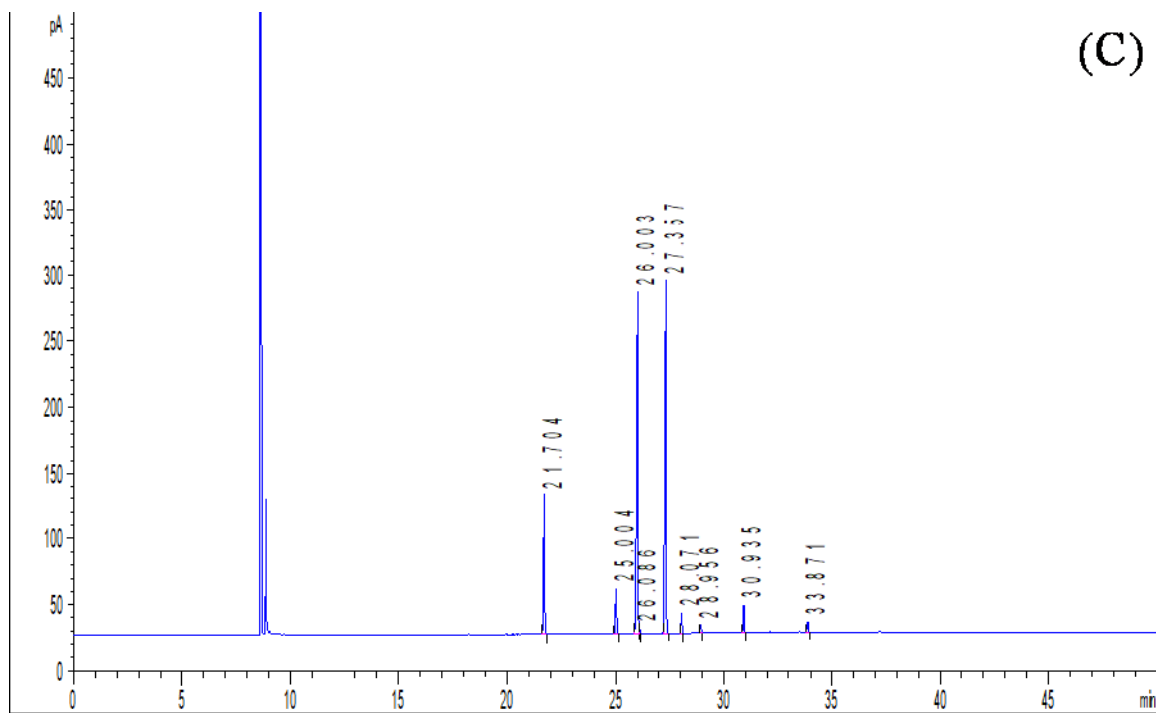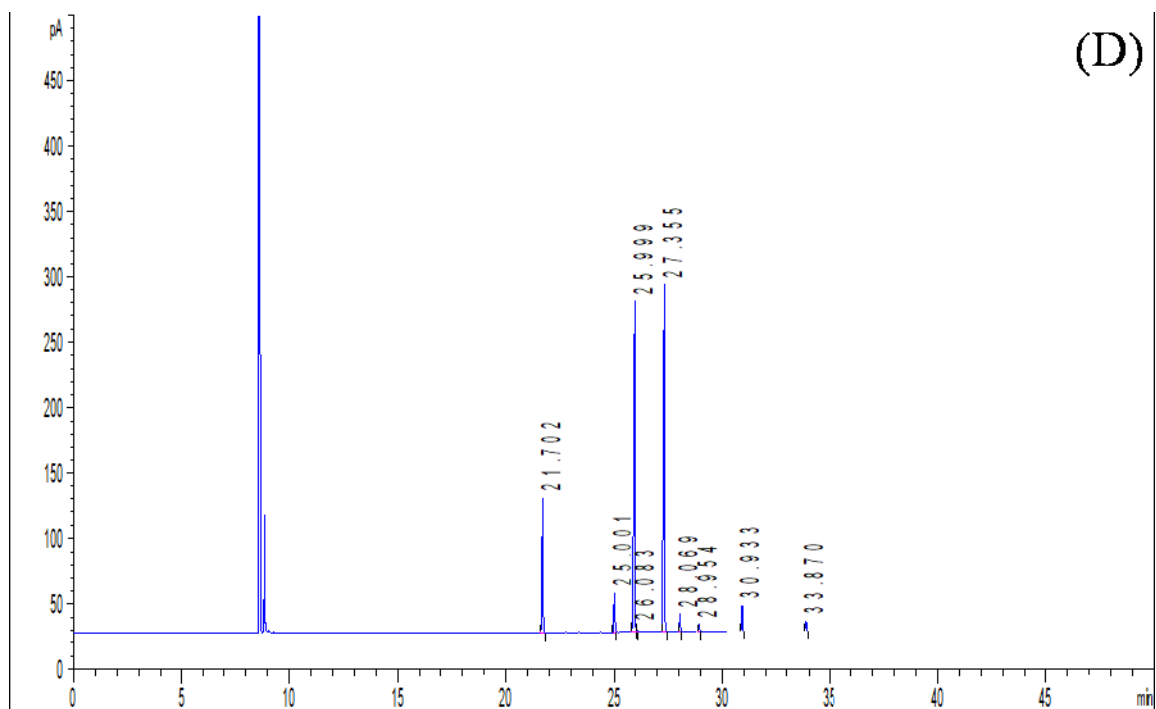

Supplementary Fig. 5

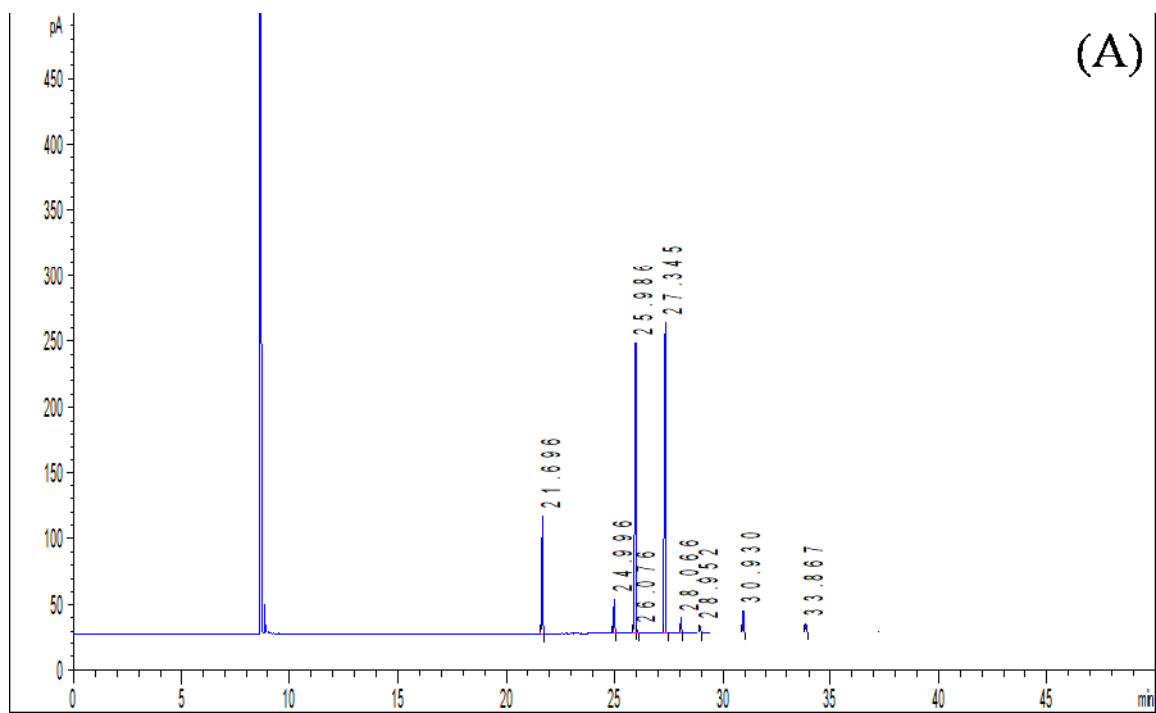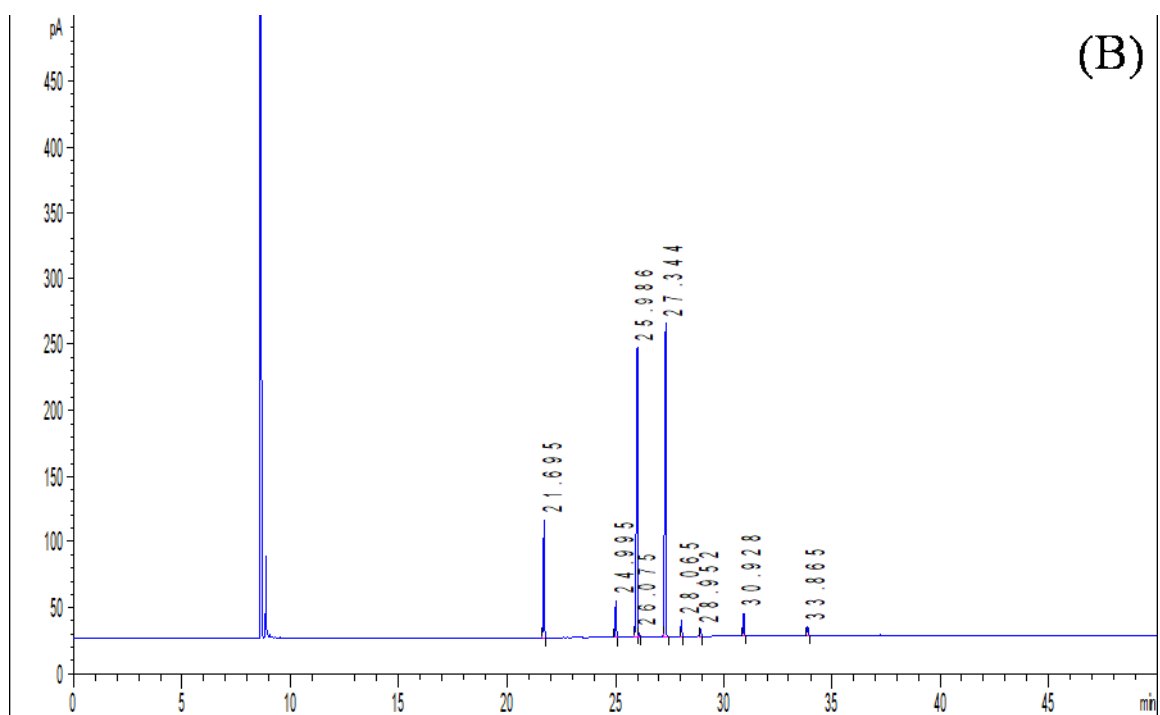

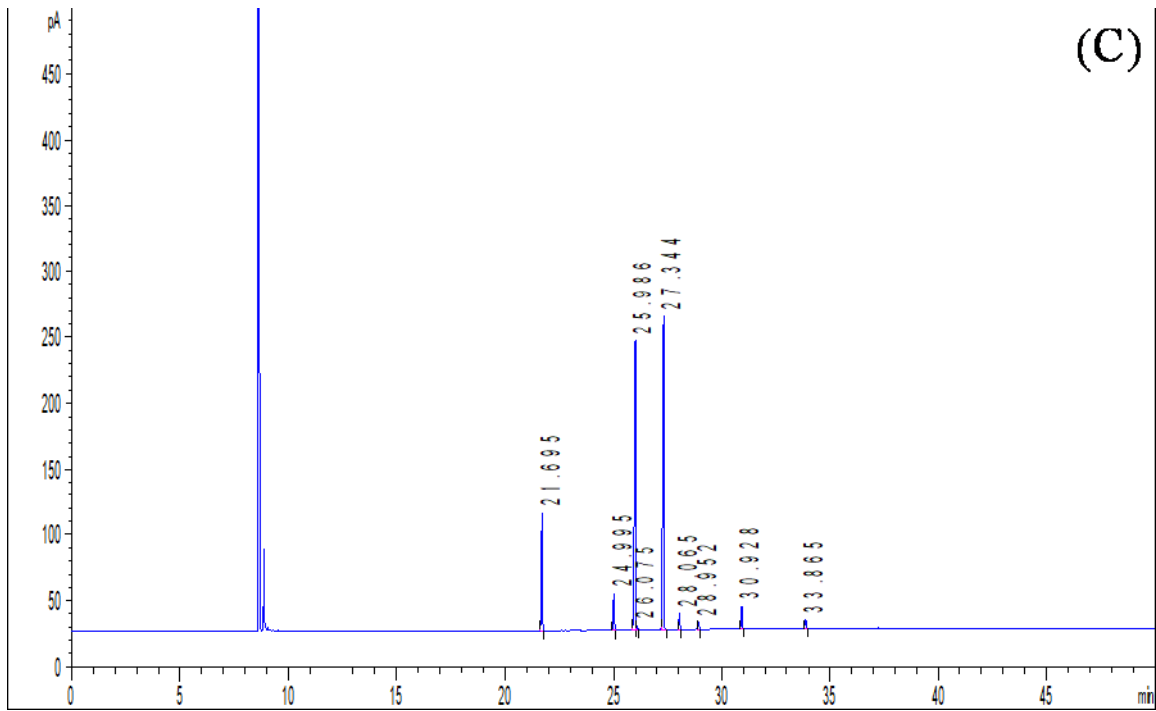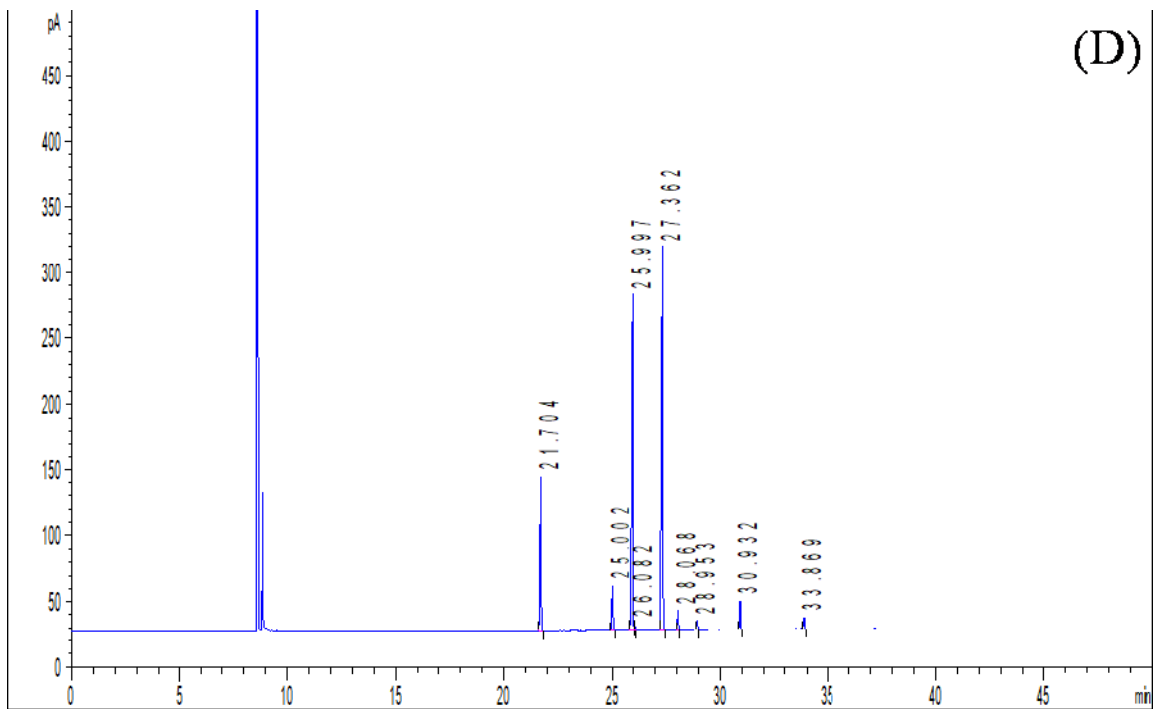

Supplementary Fig. 6
